# Supplementary material for: Erfassung von Einstellungen zu Inklusion mit SACIE, EFI-L und KIESEL
Source: Atypon-hosted journal article supplement (doi:10.1026/0012-1924/a000253), 2020-06-22
Supplement: 0012-1924_a000253_esm1.pdf [file 0012-1924_a000253_esm1.pdf]

## Elektronisches Supplement 1

### Items in der Reihenfolge des eingesetzten Fragebogens

SACIE-R (Feyerer et al., 2014; Forlin et al., 2011)

| Item | Itemtext                                                                                                                                                       | Subskala |            |          |
|------|----------------------------------------------------------------------------------------------------------------------------------------------------------------|----------|------------|----------|
|      |                                                                                                                                                                | Attitude | Sentiments | Concerns |
| S11  | Ich scheue mich davor, einer Person mit Beeinträchtigungen in die Augen zu sehen.                                                                              |          |            | x        |
| S04  | Auch unkonzentrierte, unruhige und impulsive SuS sollten gemeinsam mit allen anderen unterrichtet werden.                                                      |          | x          |          |
| S09  | Ich habe die Sorge, dass es schwierig wird, allen SuS in einem inklusiven Unterricht die entsprechende Aufmerksamkeit zu geben.                                | x        |            |          |
| S15  | <i>Es wäre für mich schlimm, wenn ich eine Beeinträchtigung hätte.</i>                                                                                         |          |            | x        |
| S02  | Auch SuS, die Leistungsanforderungen häufig nicht schaffen, sollten gemeinsam mit allen anderen unterrichtet werden.                                           |          | x          |          |
| S01  | SuS, die einen individuellen Förderplan brauchen, sollten gemeinsam mit allen anderen unterrichtet werden.                                                     | x        |            |          |
| S03  | SuS, die sich schwer tun, ihre Gedanken verbal auszudrücken sollten gemeinsam mit allen anderen unterrichtet werden.                                           | x        |            |          |
| S14  | <i>Ich fürchte mich beim Gedanken, dass ich auch einmal behindert sein werde (z. B. durch einen Unfall).</i>                                                   | x        |            |          |
| S05  | SuS, die zur Kommunikation Unterstützung brauchen (z. B.: Braille-/ Blindenschrift, Gebärdensprache), sollten gemeinsam mit allen anderen unterrichtet werden. |          | x          |          |
| S12  | Es fällt mir schwer, meinen anfänglichen Schock zu überwinden, wenn ich Menschen mit schweren körperlichen Behinderungen begegne.                              | x        |            |          |
| S13  | Ich neige dazu, Kontakte mit Menschen mit Beeinträchtigungen kurz zu halten und ich beende sie so schnell wie möglich.                                         |          | x          |          |
| S08  | Ich habe die Sorge, dass ich nicht über die erforderlichen Kenntnisse und Fähigkeiten verfüge, um SuS mit Beeinträchtigungen zu unterrichten.                  |          | x          |          |
| S06  | Ich habe die Sorge, dass ich gestresster sein werde, wenn ich SuS mit Beeinträchtigungen in meiner Klasse habe.                                                |          |            | x        |
| S15  | Ich habe die Sorge, dass sich mein Arbeitspensum erhöhen wird, wenn ich SuS mit Beeinträchtigungen in meiner Klasse habe.                                      |          |            | x        |
| S10  | <i>Ich habe die Sorge, dass SuS mit Beeinträchtigungen vom Rest der Klasse nicht akzeptiert werden.</i>                                                        |          |            | x        |

Anmerkung: Die Tabelle zeigt den vollständigen Itemtext sowie die Item-Zuordnung zu den im Original postulierten Subskalen Attitude (positive Haltungen zur inklusiven Schule im Allgemeinen), Sentiments (negative Einstellungen gegenüber Menschen mit Beeinträchtigungen im Allgemeinen und unabhängig von einem schulischen Kontext) und Concerns (Bedenken, die bzgl. der konkreten Umsetzung inklusiven Unterrichts bestehen). Kursiv gesetzte Items wurden aufgrund zu geringer Ladungen auf den latenten Faktor der jeweiligen Subskala im modifizierten Modell entfernt. Die Nummerierung bezeichnet den Variablennamen und findet sich gleichlautend in Tabelle 1 wieder.

EFI-L (Seifried & Heyl, 2016)

| Item | Itemtext                                                                                                                                                            | Subskala |        |            |
|------|---------------------------------------------------------------------------------------------------------------------------------------------------------------------|----------|--------|------------|
|      |                                                                                                                                                                     | Fachlich | Sozial | Persönlich |
| E09  | Für den Unterricht in einer inklusiven Klasse fühle ich mich prinzipiell nicht kompetent.                                                                           |          |        | x          |
| E25  | SuS mit besonderen Bedürfnissen würden sich in einer inklusiven Schulklasse allein und ausgeschlossen fühlen.                                                       |          |        | x          |
| E04  | SuS mit besonderen Bedürfnissen werden in einer inklusiven Schulklasse gleich gut unterstützt wie in einer Sonderschulklasse.                                       |          | x      |            |
| E16  | Ich empfinde den Unterricht in einer inklusiven Klasse für mich als zu belastend.                                                                                   | x        |        |            |
| E26  | SuS mit besonderen Bedürfnissen würden in einer inklusiven Schulklasse letztendlich besser gefördert.                                                               |          |        | x          |
| E01  | Wenn SuS mit besonderen Bedürfnissen in einer inklusiven Schulklasse sind, dann finden sie dort auch Freundinnen und Freunde.                                       | x        |        |            |
| E13  | In einer inklusiven Klasse können sowohl die SuS mit Beeinträchtigungen als auch die SuS ohne Beeinträchtigungen ihren Möglichkeiten entsprechend gefördert werden. |          | x      |            |
| E07  | Wenn SuS mit besonderen Bedürfnissen in einer inklusiven Schulklasse sind, bekommen sie letztendlich nicht die spezielle Unterstützung, die sie brauchen.           | x        |        |            |
| E12  | SuS mit besonderen Bedürfnissen würden in einer inklusiven Schulklasse von den anderen SuS schlecht behandelt werden.                                               | x        |        |            |
| E02  | Die Qualität des Unterrichts wird besser, wenn SuS mit besonderen Bedürfnissen dabei sind und miteinbezogen werden.                                                 |          | x      |            |
| E15  | Der Unterricht in einer inklusiven Klasse macht mir Angst.                                                                                                          | x        |        |            |
| E23  | Aufgrund meiner bisherigen Ausbildung (einschließlich Fortbildungen) fühle ich mich qualifiziert, eine inklusive Klasse zu übernehmen.                              |          |        | x          |
| E24  | SuS mit besonderen Bedürfnissen würden in einer inklusiven Schulklasse von den anderen SuS gut behandelt werden.                                                    |          |        | x          |
| E19  | SuS mit besonderen Bedürfnissen können in einer inklusiven Schulklasse Bedeutsameres lernen als in einer Sonderschulklasse.                                         |          | x      |            |
| E17  | Ich kann mir vorstellen, im kommenden Schuljahr in einer inklusiven Klasse zu unterrichten.                                                                         | x        |        |            |

*Anmerkung:* Die Tabelle zeigt den vollständigen Itemtext sowie die Item-Zuordnung zu den im Original postulierten Subskalen Fachlich (erfasst die erwarteten leistungsbezogenen Auswirkungen auf die Schülerinnen und Schüler), Sozial (bezieht sich auf die erwarteten sozialen Auswirkungen auf die Schülerinnen und Schüler) und Persönlich (meint die persönliche Bereitschaft zum Unterricht im inklusiven Setting). Die Nummerierung bezeichnet den Variablennamen und findet sich gleichlautend in Tabelle 1 wieder.

KIESEL (Bosse & Spörer, 2014)

| Item | Itemtext                                                                                                                                                       | Subskala   |         |           |
|------|----------------------------------------------------------------------------------------------------------------------------------------------------------------|------------|---------|-----------|
|      |                                                                                                                                                                | Gestaltung | Effekte | Verhalten |
| K03  | Unterricht kann grundsätzlich so gestaltet werden, dass er allen SuS gerecht wird.                                                                             |            |         |           |
| K04  | Der Leistungsstand kann in Klassen mit beeinträchtigten SuS nicht so hoch gehalten werden wie in Klassen ohne SuS mit Beeinträchtigungen.                      | x          |         |           |
| K08  | SuS mit Beeinträchtigungen sollten jede Möglichkeit bekommen, am üblichen Klassenleben teilzunehmen.                                                           | x          |         |           |
| K14  | <i>Ich weiß, dass ich ein Unterrichtsthema so vielfältig aufbereiten kann, dass auch SuS mit geistigem Förderbedarf aktiv am Unterricht teilnehmen können.</i> |            | x       |           |
| K02  | Wenn SuS mit einer geistigen Entwicklungsverzögerung eine Regelklasse besuchen, dann leidet die Qualität des Unterrichtes für die SuS ohne Beeinträchtigung.   |            |         | x         |
| K17  | <i>Ich bin in der Lage, einen Schüler zu beruhigen, der stört.</i>                                                                                             | x          |         |           |
| K09  | SuS mit Beeinträchtigungen bringen voraussichtlich Unruhe in der Regelklasse.                                                                                  |            |         | x         |
| K11  | Der höhere Freiraum in der Regelklasse verursacht zu viel Verwirrung bei den SuS mit Beeinträchtigungen.                                                       |            |         | x         |
| K05  | Die Inklusion von SuS mit Beeinträchtigungen im Regelunterricht kann gewinnbringend für die SuS ohne Beeinträchtigungen sein.                                  |            |         | x         |
| K10  | Im inklusiven Unterricht wird die Aufmerksamkeit des Lehrers <b>nicht</b> ausschließlich auf die SuS mit Beeinträchtigungen gezogen.                           |            | x       |           |
| K20  | <i>Ich kann störendes Verhalten im Klassenraum unterdrücken.</i>                                                                                               |            |         | x         |
| K13  | <i>Ich traue mir zu, Unterricht so zu organisieren, dass auch SuS mit geistiger Entwicklungsverzögerung in ihrem eigenen Lerntempo zum Ziel kommen können.</i> |            |         | x         |
| K07  | SuS mit Beeinträchtigungen haben höhere Lernzuwächse, wenn sie in Regelklassen unterrichtet werden.                                                            |            |         | x         |
| K18  | <i>Ich bin in der Lage, störendem Verhalten im Klassenraum vorzubeugen, bevor es auftritt.</i>                                                                 |            | x       |           |
| K12  | Die zusätzliche Aufmerksamkeit, die SuS mit Beeinträchtigungen einfordern, fällt zum Nachteil der SuS ohne Beeinträchtigungen aus.                             |            |         | x         |
| K19  | <i>Ich kann meinen Unterricht so gestalten, dass störendes Verhalten im Klassenraum gar nicht erst entsteht.</i>                                               |            |         | x         |
| K01  | Ein gemeinsamer Unterricht beeinträchtigter und nicht beeinträchtigter SuS kann durch entsprechende Methoden allen SuS gerecht werden.                         |            |         | x         |
| K16  | <i>Ich kann Unterricht auch im bestehenden System so organisieren, dass sogar hochbegabte SuS in ihren Stärken gefördert werden können.</i>                    | x          |         |           |
| K06  | SuS mit Beeinträchtigungen können die Entwicklung ihrer Selbstständigkeit in Regelklassen <b>nicht</b> verbessern.                                             |            |         | x         |
| K15  | <i>Ich bin mir sicher, dass ich auch bei größten Leistungsunterschieden für jede SuS ein angemessenes Lernangebot bereithalten kann.</i>                       |            | x       |           |
| K03  | Unterricht kann grundsätzlich so gestaltet werden, dass er allen SuS gerecht wird.                                                                             |            |         | x         |

Anmerkung: Die Tabelle zeigt den vollständigen Itemtext sowie die Item-Zuordnung zu den im Original postulierten Subskalen Gestaltung (Gestaltung inklusiven Unterrichts), Effekte (Effekte inklusiven Unterrichts) und Verhalten (Einfluss des Schülerinnen- und Schülerverhaltens auf inklusiven Unterricht). Kursiv gesetzte Items stammen aus den KIESEL-Subskalen zur Erfassung der Selbstwirksamkeit und wurden daher nicht zugeordnet. Die Nummerierung bezeichnet den Variablennamen und findet sich gleichlautend in Tabelle 1 wieder.
