# Supplementary material for: Erfassung von Einstellungen zu Inklusion mit SACIE, EFI-L und KIESEL
Source: Atypon-hosted journal article supplement (doi:10.1026/0012-1924/a000253), 2020-06-22
Supplement: 0012-1924_a000253_esm2.pdf [file 0012-1924_a000253_esm2.pdf]

## Elektronisches Supplement 2

### Tabellen

**Tabelle E1.** Übersicht der berücksichtigten Instrumente zur Erfassung von Einstellung zu Inklusion

|                           | SACIE (Feyerer et al., 2014; Forlin et al., 2011)                                                                                                                                                                                                                                                                                                                                                                                                         | EFI-L (Seifried & Heyl, 2016)                                                                                                                                                                                                                                                                                                                                                                                                                                                                   | KIESEL (Bosse & Spörer, 2014)                                                                                                                                                                                                                                                                                                                                                                                |
|---------------------------|-----------------------------------------------------------------------------------------------------------------------------------------------------------------------------------------------------------------------------------------------------------------------------------------------------------------------------------------------------------------------------------------------------------------------------------------------------------|-------------------------------------------------------------------------------------------------------------------------------------------------------------------------------------------------------------------------------------------------------------------------------------------------------------------------------------------------------------------------------------------------------------------------------------------------------------------------------------------------|--------------------------------------------------------------------------------------------------------------------------------------------------------------------------------------------------------------------------------------------------------------------------------------------------------------------------------------------------------------------------------------------------------------|
| Definition<br>Einstellung | “...perceptions in three constructs of inclusive education, namely, sentiments or comfort levels when engaging with people with disabilities; acceptance of learners with different needs; and concerns about implementing inclusion“ (Forlin et al. 2011, S. 50).                                                                                                                                                                                        | „[...] professionelle Werte, Überzeugungen, subjektive Theorien, normative Präferenzen und Ziele [...], die die spezifische Handlungskompetenz von Lehrkräften entscheidend mitbestimmen“ (S. 23).                                                                                                                                                                                                                                                                                              | „Vorstellungen und Annahmen [...] über schul- und unterrichtsbezogene Phänomene und Prozesse mit einer bewertenden Komponente“ (S. 280).                                                                                                                                                                                                                                                                     |
| Validierungsstichprobe    | $N = 542$ Lehramtsstudierende aus Kanada, den USA, Indien und Hong Kong (Forlin et al., 2011)<br>$N = 1.387$ und $N = 143$ Lehrkräfte aus Österreich (Feyerer et al., 2014)                                                                                                                                                                                                                                                                               | $N = 652$ Lehrkräfte an Grund-, Sonder- und weiterführenden Schulen                                                                                                                                                                                                                                                                                                                                                                                                                             | $N = 241$ Studierende für Regelschullehramt                                                                                                                                                                                                                                                                                                                                                                  |
| Faktoren<br>(Bsp.-Item)   | Attitudes (5 Items, z.B. „SuS, die einen individuellen Förderplan brauchen, sollten gemeinsam mit allen anderen unterrichtet werden“), $\alpha = .67$ .<br>Sentiments (5 Items, z.B. „Ich scheue mich davor, einer Person mit Beeinträchtigungen in die Augen zu sehen“), $\alpha = .75$ .<br>Concerns (5 Items, z.B. „Ich habe die Sorge, dass ich gestresster sein werde, wenn ich SuS mit Beeinträchtigungen in meiner Klasse habe“), $\alpha = .65$ . | Fachliche Dimension (6 Items, z.B. „SuS mit besonderen Bedürfnissen würden in einer inklusiven Schulklasse letztendlich besser gefördert“), $\alpha = .90$ .<br>Soziale Dimension (4 Items z.B. „SuS mit besonderen Bedürfnissen würden in einer inklusiven Schulklasse von den anderen SuS schlecht behandelt werden“), $\alpha = .81$ .<br>Persönliche Dimension (5 Items, z.B. „Ich kann mir vorstellen, im kommenden Schuljahr in einer inklusiven Klasse zu unterrichten“); $\alpha = .85$ | Gestaltung (4 Items, z.B. „Unterricht kann grundsätzlich so gestaltet werden, dass er allen SuS gerecht wird“), $\alpha = .77$ .<br>Effekte (4 Items, z.B. „SuS mit Beeinträchtigungen haben höhere Lernzuwächse, wenn sie in Regelklassen unterrichtet werden.“), $\alpha = .74$ .<br>Verhalten (4 Items, z.B. „SuS mit Beeinträchtigungen bringen voraussichtlich Unruhe in die Klasse“), $\alpha = .74$ . |
| Faktorkorrelationen       | $r = .05$ (Sentiments / Attitude); $r = .32$ (Sentiments / Concerns); $r = .20$ (Attitude / Concerns); Forlin et al., 2011.                                                                                                                                                                                                                                                                                                                               | $r = .59$ (fachlich / sozial); $r = .45$ (sozial / persönlich); $r = .77$ (fachlich / persönlich)                                                                                                                                                                                                                                                                                                                                                                                               | Keine Angabe                                                                                                                                                                                                                                                                                                                                                                                                 |

*Anmerkungen:* Berichtet werden Cronbach's  $\alpha$ , Faktorkorrelationen und Korrelationen zu einem Maß für Selbstwirksamkeit sofern vorhanden.

**Tabelle E2.** Deskriptive Kennwerte der Stichprobe.

|                                                  | Gesamtstichprobe | Lehramtsstudierende | Lehrkräfte    |
|--------------------------------------------------|------------------|---------------------|---------------|
| Alter: <i>M (SD)</i>                             | 26.48 (12.67)    | 20.76 (3.21)        | 47.41 (12.32) |
| Geschlecht (% weiblich)                          | 69.9             | 68.6                | 74.8          |
| Studiengang (in %)                               |                  |                     |               |
| Grundschule                                      |                  | 15.9                |               |
| Grundschule mit<br>Sonderpädagogik               |                  | 22.2                |               |
| Haupt-/Real-/Gesamtschule                        |                  | 15.5                |               |
| Haupt-/Real-/Gesamtschule mit<br>Sonderpädagogik |                  | 2.6                 |               |
| Gymnasium/Gesamtschule                           |                  | 45.4                |               |
| Abschlüsse (in %)                                |                  |                     |               |
| Bachelor                                         |                  | 85.5                |               |
| Master                                           |                  | 11.2                |               |
| Dienstjahre: <i>M (SD)</i>                       |                  |                     | 17.90 (11.77) |
| Schulart (in %)                                  |                  |                     |               |
| Grundschule                                      |                  |                     | 31            |
| Hauptschule                                      |                  |                     | 4.7           |
| Realschule                                       |                  |                     | 3.9           |
| Gesamtschule                                     |                  |                     | 25.6          |
| Gymnasium                                        |                  |                     | 16.3          |
| Förderschule                                     |                  |                     | 20.9          |

**Tabelle E3.** Modellfit der Messmodelle für *SACIE*, *EFI-L* und *KIESEL*

| Modell             | $\chi^2$ | <i>df</i> | <i>p</i> | CFI  | RMSEA | RMSEA<br>90% KI | SRM<br>R | $\Delta$ CFI | $\Delta$ RMSEA | $\Delta p$ |
|--------------------|----------|-----------|----------|------|-------|-----------------|----------|--------------|----------------|------------|
| <i>SACIE</i>       |          |           |          |      |       |                 |          |              |                |            |
| Modell 1           | 1225.89  | 90        | < .01    | .556 | .151  | .144 - .159     | .119     |              |                |            |
| Modell 2           | 438.73   | 87        | < .01    | .863 | .086  | .078 - .094     | .081     |              |                |            |
| Modell 2a          | 113.61   | 51        | < .01    | .971 | .047  | .036 - .059     | .041     |              |                |            |
| Mehrgruppenmodelle |          |           |          |      |       |                 |          |              |                |            |
| Modell 3           | 171.10   | 102       | < .01    | .968 | .043  |                 |          | -            | -              | -          |
| Modell 4           | 198.25   | 111       | < .01    | .961 | .046  |                 |          | .007         | .002           | .025       |
| Modell 5           | 286.32   | 120       | < .01    | .920 | .063  |                 |          | .041         | .018           | < .01      |
| Modell 6           | 313.14   | 123       | < .01    | .909 | .067  |                 |          | .014         | .004           | < .01      |
| <i>EFI-L</i>       |          |           |          |      |       |                 |          |              |                |            |
| Modell 1           | 888.28   | 90        | < .01    | .749 | .127  | .119 - .135     | .087     |              |                |            |
| Modell 2           | 280.65   | 87        | < .01    | .939 | .064  | .055 - .072     | .049     |              |                |            |
| Mehrgruppenmodelle |          |           |          |      |       |                 |          |              |                |            |
| Modell 3           | 384.86   | 174       | < .01    | .933 | .059  |                 |          | -            | -              | -          |
| Modell 4           | 424.95   | 186       | < .01    | .925 | .061  |                 |          | .009         | .002           | < .01      |
| Modell 5           | 518.31   | 198       | < .01    | .896 | .069  |                 |          | .029         | .008           | < .01      |
| Modell 6           | 561.72   | 201       | < .01    | .882 | .073  |                 |          | .014         | .004           | < .01      |
| <i>KIESEL</i>      |          |           |          |      |       |                 |          |              |                |            |
| Modell 1           | 292.62   | 54        | < .01    | .892 | .090  | .080 - .100     | .051     |              |                |            |
| Modell 2           | 232.90   | 51        | < .01    | .918 | .081  | .070 - .091     | .045     |              |                |            |
| Mehrgruppenmodelle |          |           |          |      |       |                 |          |              |                |            |
| Modell 3           | 292.70   | 102       | < .01    | .909 | .075  |                 |          | -            | -              | -          |
| Modell 4           | 324.20   | 111       | < .01    | .901 | .075  |                 |          | .009         | .000           | < .01      |
| Modell 5           | 381.38   | 120       | < .01    | .874 | .081  |                 |          | .027         | .006           | < .01      |
| Modell 6           | 404.56   | 123       | < .01    | .865 | .083  |                 |          | .009         | .002           | < .01      |

*Anmerkungen:* Modell 1 = 1-Faktor-Modell, Modell 2 = 3-Faktor-Modell, Modell 2a = modifiziertes 3-Faktor-Modell, Modell 4 = (modifiziertes) 3-Faktor-Mehrgruppenmodell für Lehramtsstudierende (LS) und Lehrkräfte (LK), Modell 4 = Modell 3 mit gleichgesetzten Ladungen über beide Gruppen (metrische Messinvarianz), Modell 5 = Modell 4 mit gleichgesetzten Intercepts (skalare Messinvarianz), Modell 6 = Modell 5 mit gleichgesetzten Residuen (strikte Messinvarianz);  $\Delta p$  wurde auf Basis eines  $\chi^2$ -Differenzentestes berechnet; Kriterien zur Bewertung der Veränderungen im Modellfit:  $\Delta$ CFI > .01 und  $\Delta$ RMSEA > .015 zeigt signifikante Veränderung an.

**Tabelle E4.** Korrelationen (Pearson's  $r$ ) zwischen den Einstellungsskalen (Lehramtsstudierende)

|                           | <i>SACIE</i> |          |            | <i>EFI-L</i> |        |            | <i>KIESEL</i> |         |           |
|---------------------------|--------------|----------|------------|--------------|--------|------------|---------------|---------|-----------|
|                           | Attitudes    | Concerns | Sentiments | Fachlich     | Sozial | Persönlich | Gestaltung    | Effekte | Verhalten |
| Attitudes                 | -            | -.339    | -.273      | .596         | -.494  | .455       | .655          | .661    | -.618     |
| Concerns                  |              | -        | .302       | -.360        | .299   | -.486      | -.378         | -.310   | .407      |
| Sentiments                |              |          | -          | -.200        | .302   | -.378      | -.215         | -.258   | .240      |
| Fachlich                  |              |          |            | -            | -.764  | .626       | .739          | .710    | -.719     |
| Sozial                    |              |          |            |              | -      | -.550      | -.597         | -.623   | .598      |
| Persönlich                |              |          |            |              |        | -          | .532          | .524    | -.517     |
| Gestaltung                |              |          |            |              |        |            | -             | .935    | -.955     |
| Effekte                   |              |          |            |              |        |            |               | -       | -.901     |
| Verhalten                 |              |          |            |              |        |            |               |         | -         |
| SW-Gestaltung             | .436         | -.378    | -.196      | .486         | -.377  | .526       | .587          | .559    | -.571     |
| SW-Klassen-<br>management | .264         | -.251    | -.208      | .234         | -.220  | .327       | .281          | .266    | -.289     |
| Neurotizismus             | -.078        | .189     | .171       | -.09         | .107   | -.184      | -.04          | -.042   | .048      |
| Offenheit                 | .243         | -.14     | -.130      | .208         | -.190  | .234       | .226          | .240    | -.212     |
| Gewissenhaftigkeit        | .066         | -.051    | -.102      | .028         | -.033  | .096       | .063          | .076    | -.032     |
| Extraversion              | .133         | -.123    | -.155      | .106         | -.129  | .176       | .102          | .141    | -.075     |
| Verträglichkeit           | .226         | -.185    | -.201      | .214         | -.210  | .311       | .228          | .247    | -.203     |

Anmerkungen: SW = Selbstwirksamkeitserwartung, nicht-signifikante Korrelationen sind kursiv gedruckt, alle anderen Korrelationen sind signifikant ( $p < .05$ ).

**Tabelle E5.** Korrelationen (Pearson's  $r$ ) zwischen den Einstellungsskalen (Lehrkräfte)

|                           | <i>SACIE</i> |          |            | <i>EFI-L</i> |        |            | <i>KIESEL</i> |         |           |
|---------------------------|--------------|----------|------------|--------------|--------|------------|---------------|---------|-----------|
|                           | Attitudes    | Concerns | Sentiments | Fachlich     | Sozial | Persönlich | Gestaltung    | Effekte | Verhalten |
| Attitudes                 | -            | -.507    | -.321      | .729         | -.632  | .683       | .753          | .763    | -.743     |
| Concerns                  |              | -        | .411       | -.519        | .338   | -.669      | -.589         | -.563   | .580      |
| Sentiments                |              |          | -          | -.253        | .192   | -.392      | -.374         | -.383   | .363      |
| Fachlich                  |              |          |            | -            | -.832  | .815       | .846          | .858    | -.853     |
| Sozial                    |              |          |            |              | -      | -.715      | -.714         | -.717   | .717      |
| Persönlich                |              |          |            |              |        | -          | .767          | .766    | -.752     |
| Gestaltung                |              |          |            |              |        |            | -             | .970    | -.983     |
| Effekte                   |              |          |            |              |        |            |               | -       | -.959     |
| Verhalten                 |              |          |            |              |        |            |               |         | -         |
| SW-Gestaltung             | .698         | -.610    | -.427      | .727         | -.577  | .787       | .790          | .795    | -.765     |
| SW-Klassen-<br>management | .421         | -.331    | -.319      | .419         | -.448  | .524       | .463          | .499    | -.450     |
| Neurotizismus             | -.12         | .204     | .276       | -.086        | .135   | -.261      | -.105         | -.125   | .074      |
| Offenheit                 | .225         | -.159    | -.193      | .246         | -.198  | .277       | .205          | .240    | -.229     |
| Gewissenhaftigkeit        | -.003        | .029     | -.165      | -.137        | .140   | <.001      | -.154         | -.122   | .171      |
| Extraversion              | .182         | -.191    | -.295      | .175         | -.141  | .217       | .198          | .175    | -.213     |
| Verträglichkeit           | .340         | -.298    | -.283      | .368         | -.307  | .440       | .407          | .405    | -.407     |

Anmerkungen: SW = Selbstwirksamkeitserwartung, nicht-signifikante Korrelationen sind kursiv gedruckt, alle anderen Korrelationen sind signifikant ( $p < .05$ ).
